# Supplementary material
Source: Springer Nature journal article supplement (https://www.springermedizin.de/resource/supplementary/13075_2011_3191_MOESM1_ESM.pdf/9693958)

A

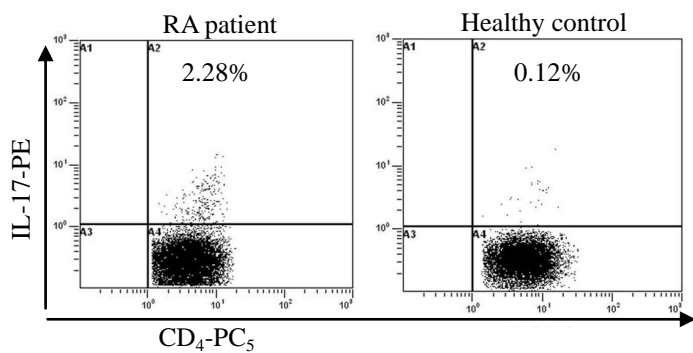

D

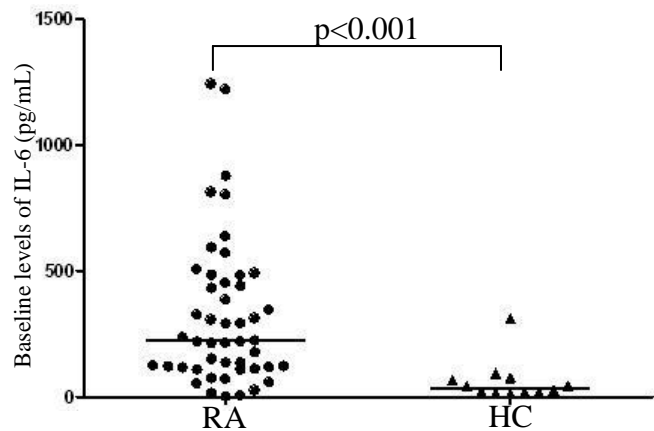

B

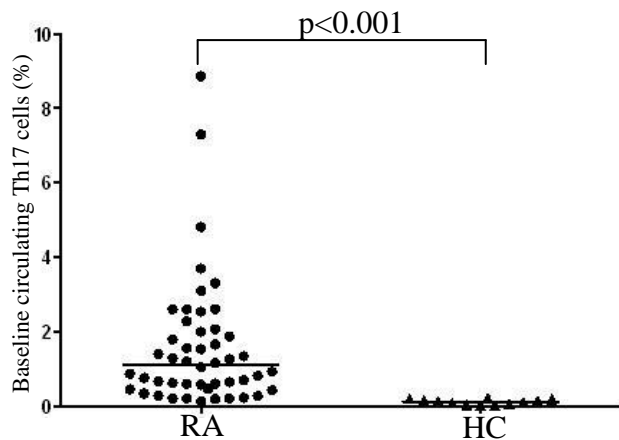

E

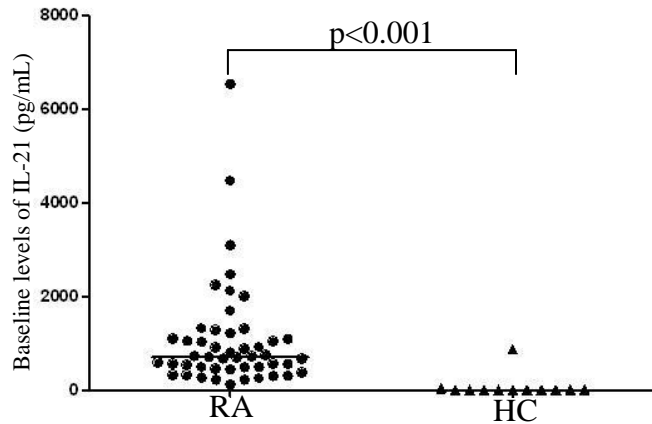

C

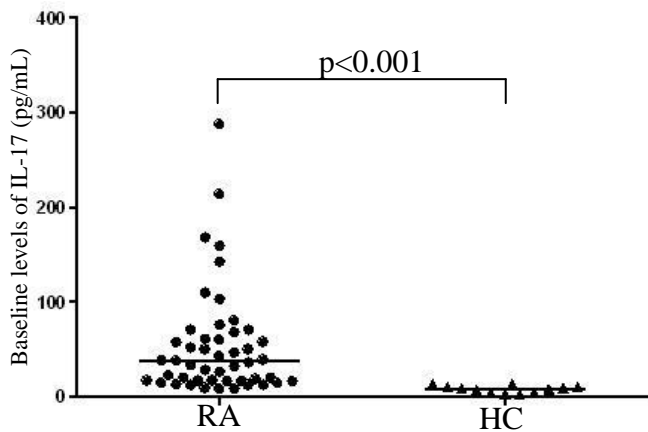

F

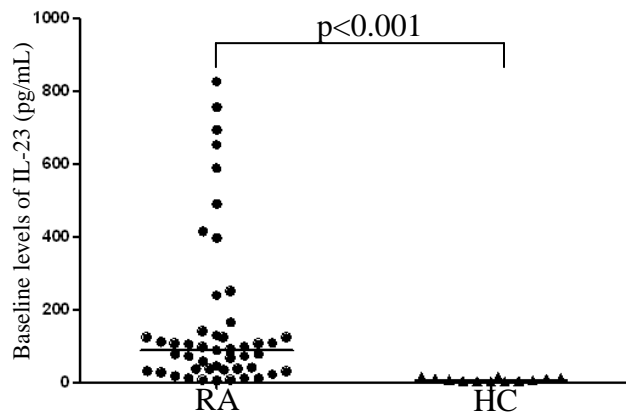

Supplement: MOESM1 [file 9693958]
